# Supplementary material for: Oenothein B, dimeric hydrolysable tannin inhibiting HCV invasion from Oenothera erythrosepala
Source: Springer Nature journal article supplement (doi:10.1007/s11418-018-1239-1), 2018-08-21
Supplement: MOESM1 [file 16061730]

Oenothein B, Dimeric Hydrolysable Tannin Inhibiting HCV Invasion from *Oenothera erythrosepala*

Satoru Tamura a,b,*, Gang-Ming Yang a, Teruaki Koitabashi a, Yoshiharu Matsuura c, Yasumasa Komoda c, Tomikazu Kawano b and Nobutoshi Murakami a

*a Graduate School of Pharmaceutical Sciences, Osaka University, 1-6 Yamada-oka Suita, Osaka 565-0871, Japan.*

*b School of Pharmacy, Iwate Medical University, 2-1-1 Nishitokuda Yahaba-cho Siwa-gun, Iwate 019-3694, Japan.*

*c Research Center for Emerging Infectious Diseases and Research Institute for Microbial Diseases, Osaka University, 3-1 Yamada-oka Suita, Osaka 565-0871, Japan.*

Chart 1. HPLC chromatogram in final purification of oenothein B (**1**) by reverse phase HPLC

Chart 2. 1H NMR chart of isolated oenothein B (**1**)
